# Supplementary material
Source: PubMed Central journal article supplement (PMC5617254)
Supplement: pnas.1702581114.sapp.pdf [file pnas.1702581114.sapp.pdf]

# A global transcriptional regulatory network for *Escherichia coli* robustly connects gene expression to transcription factor activities

Fang et al.

## Supporting Information (SI)

### SI Methods.

**Transcriptional regulatory network expansion.** We constructed an expanded transcriptional regulatory network (TRN) based on RegulonDB version 9.4 (last updated 05-08-2017) (1) and primary literature that included Chromatin Immunoprecipitation (ChIP)-binding data. Specifically, we added ChIP-based regulatory interactions for 15 regulons: *arcA* and *fnr* (2–4), *argR* (5, 6), *trpR*, *lrp* (6), *fur* (7), *gadEWX* (8), *oxyR*, *soxRS* (9), *purR* (10), *crp* (11) and *cra* (12). All regulatory interactions were specified to be either activation or repression. If the regulatory direction was uncertain, we added an interaction each for activation and repression.

**Preparation of expression compendium.** We used the EcoMAC microarray compendium (13) to analyze transcriptomic shifts across conditions. In this study, we aimed to assess how consistent our TRN was with measured transcriptome changes across a variety of conditions. Therefore, we chose to exclude experiments from the compendium that either perturbed the TRN wiring, or included artificial environmental perturbations that may not be representative of the evolutionary history of *E. coli*. We also focused our analysis on the exponential growth phase. We thus included only a relevant subset of all conditions, as with (14). Specifically, we excluded regulatory rewiring samples, as they would not represent the naturally-evolved expression patterns. We also removed microgravity and magnetic treatment conditions, as these perturbations were not representative of the evolutionary history of *E. coli*. Since our TRN was reconstructed primarily for *E. coli* K-12, we kept only strains labeled as K12, MG1655, BW25113, and W3110. We removed time-dependent samples (i.e., kept arrays with Time labeled blank, WT, exponential, mid log phase, and mid-log phase). Finally, we had 444 relevant samples.

**PCA analysis.** PCA analysis was performed with the PCA function in the sklearn.decomposition package. Each principal component is a linear combination of all genes, and 100 genes with the heaviest loadings in each component were subjected to enrichment analysis with respect to regulon, GO, COG and KEGG.

**Analysis of the first two principal components from PCA.** PCA reduced the dimensionality of the dataset to 50 principal components by 441 samples, in which each principal component was a linear combination of 4,189 genes. Upon plotting the first and second components, the 441 samples were separated into 3 distinct groups (Fig. S18). To understand the separation of the data, metadata including medium, oxygen level, and carbon source were used to label the data points. However, the division of the dataset between the 3 groups did not show a clear correlation with metadata. Interestingly, out of all 441

samples, all 188 samples originating from the Faith lab fell into the same group (Fig. S19). But also note in most of Faith et al.'s samples, DNA damage was induced by norfloxacin, which was not used by any other group. The usage of norfloxacin could potentially explain the clustering of the 188 experiments.

Regulon enrichment analysis was performed on the top 100 genes that carried the most weight in the first and second principal components. The results showed that the first component was enriched for only 3 regulon *nanR* ( $P = 0.02$ ), *basR* ( $P = 0.035$ ), *mlrA* ( $P = 0.02$ ). The second component was enriched for multiple stress response regulons including acid resistance regulons *GadE*, *GadW*, *GadX* and *phoP*, antibiotic resistance regulon *marA* ( $P < 10^{-4}$ ), anaerobic growth regulon *adiY*, motility system regulons *flhD/flhC* and *fliZ*. However, the coverage of the transcriptional regulatory network was relatively low for the top loaded genes. Out of the top 100 genes for each component, 69 genes were not found in the TRN for component 1, while 43 genes were not found for component 2.

**Non-negative Matrix Factorization (NMF).** NMF decomposes the non-negative matrix  $A$  into two positive matrices  $W$  and  $H$ :  $A = WH$ . Matrix  $A$  is generated from the EcoMAC dataset as follows: to meet the non-negativity constraint for NMF analysis, each gene was represented in two columns. One indicates positive expression and the other one indicates negative expression compared to wild type (15). NMF was then performed on the transformed dataset  $A$  that had a dimension of (8378, 441). The reduced dimensionality was determined by two methods. The first method compares NMF with singular value decomposition on a random matrix that has the same dimension, mean and variance as the original dataset. The second approach adopted from Wu's study ensures the stability of NMF results (16). Wu's approach minimizes the dissimilarities between matrices across different runs. NMF analysis was then performed using the NMF function in the sklearn.decomposition package, with the number of components set to be 40, and initializing method set to be 'nndsvd', which is better for sparseness. Default values were used for all other parameters. To reconstruct matrix  $W$ , the negative expression is subtracted from the positive expression for each gene to create a new matrix  $W$  that has a dimension of (4189,40). Each column in the  $W$  represents a metagene, and the entries represent the coefficient of each gene. Matrix  $H$  is the expression pattern of metagenes. The top genes that account for 15% of the weight for the entire metagene were identified as dominating genes, and enriched for regulons.

**Selection of dimensionality for NMF.** The first method used for dimensionality selection was adopted from Kim and Tidor's paper (17). It utilized singular value decomposition (SVD), one of the more established methods for dimensionality reduction, as SVD was proven to produce the minimum error for a given

125 dimensionality. It is illustrated in Fig. S20 that NMF is  
126 an appropriate method for dimensionality reduction on this  
127 dataset, as the error generated during NMF reconstruction is  
128 comparable to that produced by SVD. For comparison, SVD  
129 is also performed on a random dataset that does not have  
130 any correlated features. The random matrix has a gaussian  
131 distribution and shares the same dimension, mean and variance  
132 of the EcoMAC dataset. The slope of the SVD\_random  
133 represents the additional structure of the uncorrelated matrix  
134 captured by adding one more basis vector. The comparison  
135 of the slopes between NMF and SVD\_random justified the  
136 choices of the reduced dimension, as the slopes are comparable  
137 between the dimension of 35 and 50.

138 Due to the random seed utilized during the Sci-kit Learn  
139 NMF function, the decomposition result from each run varies.  
140 Wu's method (16) was adopted to ensure the stability of  
141 the NMF results. For each dimension between 35 and 50,  
142 we generated 100 alternative optimal solutions close to the  
143 global optimum. To quantify the stability of the W matrix for  
144 each dimension, dissimilarity between W matrices is measured  
145 by an Amari-type error, which is calculated from the cross-  
146 correlation matrix between the columns of W matrices. The  
147 dimension that has the smallest average Amari-type error  
148 produces the most stable NMF results. For the EcoMAC  
149 dataset, a dimension of 40 produced the smallest Amari-type  
150 error and thus was chosen to be the reduced dimension.

151 **Overlap between PC membership and NMF membership.** We investigated the overlap of dominant genes between PCA and NMF analysis. We have identified a total of 1961 dominant genes (following the same method in NMF analysis) in the 40 principal components in PCA analysis, and 1734 dominant genes in 40 metagenes in NMF analysis. Our results showed that 80.2% (1391/1734) of the dominant genes in NMF analysis overlapped with the dominant genes in PCA, which suggest consistency between two methods. Due to the difference in the nature of these two methods, the individual components of these two methods are different as expected.

163 **Regulon Enrichment analysis.** Regulon enrichment analysis was performed using the fisher\_exact function in the scipy.stats package. Prior to the analysis, the following variables were calculated: the size of each regulon, the size of the set of genes subjected to enrichment analysis, the overlap between the set of interest and each regulon, and the total number of genes involved in TRN and EcoMAC. The Fisher-exact test calculates P-values for each regulon, and a regulon is considered to be enriched if the p-value is less than 0.05.

173 **Core regulatory module identification.** We identified a core regulatory network by integrating the results of differential gene expression identification, enrichment analysis of ChIP-based regulons, and dimensionality reduction into biological 'parts' by NMF. For NMF, we used regularized NMF with a 15% cutoff of metagene loadings to define representative genes. Alternatively, we used non-smooth NMF (18), which produced more sparse metagenes and required a 0.001 cutoff of the coefficients. Since the NMF algorithms use randomization to solve the non-convex optimization problem, we randomly started NMF 100 times to retain alternate optimal solutions close to the global optimum. We then performed enrichment analysis of regulons for the representative genes in the metagene loadings.

Using all 200 (2 NMF algorithms x 100 runs) TF-metagene enrichment results, we created a co-enrichment network of TFs: i.e., co-occurrence network of pairs of TFs enriched in the same metagene. We quantified the strength of co-enrichment of a given TF pair using the Jaccard index

$$J(A, B) = \frac{|A \cap B|}{|A| + |B| - |A \cap B|}$$

where  $|A \cap B|$  is the number of metagenes for which TF A and B are co-enriched,  $|A|$  the number of metagenes for which TF A is enriched, and  $|B|$  the number of metagenes for which TF B is enriched. To retain only statistically significant pairs of co-enriched TFs, we compared the network against 100,000 randomly generated co-enrichment networks by sampling from the observed frequency of enriched TFs. Only the TF pairs having FDR-adjusted  $P < 0.05$  were kept. We also only kept TF pairs that were strongly coenriched, in this case Jaccard index  $> 0.18$ . We finally had 522 significant co-enriched TF pairs. We then performed community detection on this significant co-enrichment network. We used multi-level modularity optimization using the cluster\_louvain function in igraph (19). The modularity coefficient was 0.483. The modularity for the computed graph was always greater than the random graphs, so we deemed it to be significant. Finally, we identified a significant, core TRN consisting of 10 major modules (11, including non-coenriched TFs) that were functionally-annotated by DAVID(20) followed by manual curation. These modules were then used for further characterization.

We applied this workflow also for the COLOMBOS compendium (21). For COLOMBOS, we obtained 484 significant co-enriched TF pairs. The multi-level modularity optimization resulted in 11 modules (12, including non-coenriched TFs) with modularity coefficient of 0.57. The regulatory modules for both compendia are in Dataset S2.

**Robustness of TF modules.** Since new ChIP-binding data is constantly being generated, the TRN network is always expanding to incorporate new interactions. Therefore, we also evaluated the robustness of the TRN modules when new interactions between TFs and genes are added to the TRN network. We added in low-confidence interactions from up to 60 random regulons ten times each. Note that if the TF for a randomly chosen regulon already existed, the low-confidence interactions for that regulon were added. We then computed similarity of clusterings using two measures. First, we used the variation of information (VI) (22) for the TFs common between the original and perturbed TRNs. This metric thus reflects to what extent TFs within a module get re-assigned to different modules as new regulatory interactions or TFs are discovered. Because VI did not account for the new TFs added we also used a Jaccard index-based metric to quantify the overall change in TF modules. Given original and alternative modules from the original and perturbed TRNs, we computed the Jaccard index for all pairs of modules based on the TFs within the modules. For each original module, we defined its similarity to be the highest Jaccard index between it and all alternate modules. Thus, the similarity of the original to the perturbed modules was the mean of these Jaccard indices across all the original modules. The similarity of the alternative to original modules was computed in the same way, to account for potentially new modules arising with new TFs. The final Jaccard index-based

249 similarity between the two clusterings was the average of these  
250 two similarities.  
251  
252 **Conservation of TF regulons.** Gene annotation of strains  
253 and species were obtained from the SEED server  
254 (<http://theseed.org>), and ortholog calculation to *E. coli* K-12  
255 MG1655 was also performed on the RAST (Rapid Annotation  
256 using Subsystem Technology) server (23). The number of  
257 strains in each phylogenetic group was 33 Enterobacteriaceae,  
258 134  $\gamma$ -proteobacteria, 40  $\beta$ -proteobacteria, 58  $\alpha$ -proteobacteria,  
259 and 23  $\delta$ -proteobacteria. The percentage of gene conservation  
260 indicates the number of strains having a particular gene in  
261 a phylogenetic group divided by the total number of strains  
262 in the group. We computed conservation of the 147 *E. coli*  
263 TFs in our hiTRN across these phylogenetic groups. We then  
264 identified modules consisting of TFs having significantly high  
265 or low evolutionary conservation compared to all other TFs  
266 (Wilcoxon rank sum test  $P < 0.05$ ).  
267  
268 **TF binding motif analysis.** Sequences of TF binding motifs were  
269 collected from RegulonDB(1). Sequence homology between  
270 TF binding motifs was analyzed using the global alignment  
271 function in the Bio.pairwise2 package. The best match between  
272 each pair of TFs was identified and alignment score was  
273 recorded. For each TF module, we compared the alignment  
274 scores of TF within and outside the modules with Mann-  
275 Whitney-Wilcoxon test. TF modules that have a p-value less  
276 than 0.05 were considered to have more similar binding motifs  
277 within the modules.  
278  
279 **TF structure analysis.** Homology models for the protein se-  
280 quences were generated for 117 of the 147 TFs in the core  
281 regulatory network using the I-TASSER software package (24).  
282 DNA-binding domain predictions were also carried out for 114  
283 TFs based on templates available in the PDB. The structures  
284 were compared using the pairwise rigid FATCAT aligner (25),  
285 creating an all vs. all alignment. The average TM-score (simi-  
286 larity score in the range of [0,1] (26)) of all pairwise alignments  
287 within each cluster was compared to the average TM-score of  
288 the alignments from randomly-generated groups of TFs of the  
289 same size to generate a p-value for each cluster. In addition,  
290 a hypergeometric test was applied to domain assignments by  
291 (27) to test for domain enrichment in clusters.  
292  
293 **Toxin-Antitoxin analysis on TF modules.** In the most updated  
294 TRN, we have included multimer TFs, among which 3 of  
295 them are also toxin-antitoxin (TA) gene pairs: *dinJ-yafQ*,  
296 *relE-relB*, *yefM-yoeB*. We also included monomer TFs that are  
297 components of the TA pairs, including *yefM*, *relB*, *higA*. Out  
298 of 6 TFs that are members of TA pairs, 5 TFs (*relE-relB*, *yefM*,  
299 *relB*, *yefM-yoeB*, *higA*) are in the same TF module (module  
300 6). Interestingly, module 6 is represented by stress response  
301 TFs, which is consistent with the functional roles of the TA  
302 members (amino acid starvation, multidrug resistance, etc.).  
303 Thus, the TAs studied here change expression in a functionally  
304 cohesive manner across conditions.  
305  
306 **Differentially-expressed gene (DEG) Identification.** DEGs were iden-  
307 tified using the R package limma in Bioconductor (28). The  
308 reference samples used for all samples were wild type MG1655  
309 grown in M9 with glucose as carbon source under aerobic  
310 condition. The replicates of all experimental conditions were  
311 identified and compared against reference sample using limma.

Genes having an expression level fold change greater than 2  
and (FDR) adjusted p-value less than 0.05 were identified as  
DEGs.

**Network-expression consistency analysis.** Network analysis was  
done on the DEGs for experiments that involve at least one  
TF knockout. DEGs were identified using limma (28) with  
different reference samples for each experimental condition.  
Using SigNetTrainer (29), we computed the consistency of the  
TRN (including direction of regulation—activation vs. inhibi-  
tion) with measured expression changes for TF knockout  
experiments.

In addition, consistency and reachability for only DEGs  
were calculated for 20 experiments, as 3 experiments had none  
or only very few DEGs identified. We have also performed  
a permutation test, in which we selected a random TF (or  
two TFs depending on the original number of TFs that were  
knocked out in each experiment) to be the knocked out TF in  
each experiment, and calculated the reachability from DEGs  
to the randomly selected TF(s). P-value for the permutation  
test was calculated for 10,000 runs to be  $3.91 \times 10^{-4}$ .

Reachability was calculated by utilizing the igraph pack-  
age in Python (19). A graph containing all the nodes and  
edges in the TRN was established, and all the nodes that  
could be reached from each TF were recorded. Reachability  
was then calculated by identifying the overlap of the set of  
nodes reachable by the TF and the DEGs in the TF knockout  
experiment.

**Information Analysis.** The mutual information between two dis-  
tributions is defined as:

$$MI(X, Y) = H(X) + H(Y) - H(X; Y)$$

where  $H(X)$  is the entropy of distribution X,  $H(Y)$  is the  
entropy of distribution Y, and  $H(X, Y)$  is the joint entropy of  
distributions X and Y. The entropy of a discrete distribution  
is defined as:

$$H(X) = \sum_i -p_i \log p_i$$

where  $p_i$  is the probability of state  $i$ . Mutual information  
for continuous variables can be calculated using differential  
entropy, rather than entropy. The mutual information between  
two genes was defined as the mutual information between the  
log fold change expression profiles of each gene, as calculated  
by the NPEET package for Python (30).

For each TF, the mutual information was calculated be-  
tween the TF expression profile and the expression profile  
of each gene in its regulon. This distribution was compared  
against the MI between the TF expression profile and all other  
genes not in its regulon using the Wilcoxon rank-sum test  
( $\alpha = 0.05$ ). The null hypothesis states the MI distributions  
originated from the same distribution, and the alternative  
states that the MI distribution of the genes in the regulon is  
greater than the distribution of the genes outside the regu-  
lon. Only high confidence interactions were included in the  
analysis.

In addition, the mutual information was compared for pairs  
of genes in the same regulatory module as compared to genes  
not sharing a module. The mutual information was calculated  
for 1,000 randomly selected gene pairs in each module, and  
for 1,000 randomly selected gene pairs that did not belong to

373 the same module, serving as the null distribution. A Mann-  
 374 Whitney-U test was applied to each module against the null,  
 375 with a significance value of  $p < 0.05$  to determine if the MI  
 376 between genes within each module were significantly higher  
 377 than the MI between genes not sharing a module.

378  
 379 **Expression Profile Regression.** The expression log fold change of  
 380 transcription units was calculated by averaging the log fold  
 381 change of each gene in the TU. TUs were defined from Regu-  
 382 lonDB (1), and only those with strong evidence or greater were  
 383 kept; in all other cases the TUs were defined as single genes.  
 384 Of the resulting 1538 TUs, EcoMAC contained expression  
 385 data for 1364 TUs, and sigma factors were defined for 1098  
 386 TUs.

387 Eight model structures were used to predict the TU expres-  
 388 sion profile, with features including the log-fold change of the  
 389 known regulators of the TU, cooperation/competition terms  
 390 for all combinations of two TFs, and the log-fold change of the  
 391 known sigma factors of the TUs.

392 Both linear regression and support vector regression were  
 393 performed using the Scikit-learn package for Python (31). For  
 394 the support vector regressors, the parameters C, gamma and  
 395 epsilon were optimized using 3-fold cross validation for each  
 396 individual TU regression. The accuracy of the regression mod-  
 397 els was measured by the average coefficient of determination  
 398 ( $R^2$ ) across a 10-fold cross validation. Samples from the same  
 399 lab under the same condition were not split across folds.

400 We performed an F-test on the linear regression of the  
 401 training data to determine if the TFs or sigma factors signifi-  
 402 cantly improved the prediction results for each gene. The  $R^2$   
 403 values of the testing data as predicted by the linear model  
 404 and SVR were compared using the Wilcoxon signed-rank test.  
 405 To determine whether the model captured condition-specific  
 406 effects, we shuffled the TU expression profiles 1000 times and  
 407 then ran the regression on each shuffled profile using 10-fold  
 408 cross validation, while maintaining the condition-based order  
 409 of the regulator expression profiles. The shuffling served to  
 410 unlink the experimental condition of the regulators from the  
 411 conditions of the predicted expression profile. Significance  
 412 was assigned to each TU by calculating the fraction of shuf-  
 413 fled profiles with a higher testing  $R^2$  value than the original  
 414 regression, and applying the Benjamini-Hochberg procedure  
 415 to the resulting distribution with an FDR of 0.05. The rela-  
 416 tive power of our TRN compared to a randomized TRN was  
 417 calculated by randomly assigning 1000 sets of TFs to each  
 418 TU and running the regression using both the linear model  
 419 and the SVR on each set. The number of regulators for each  
 420 TU was maintained, and TFs that had a high mutual infor-  
 421 mation with true regulators of the TU were not assigned to  
 422 the TU. As before, significance was assigned to each TU by  
 423 determining the fraction of randomly generated TRNs with  
 424 higher testing  $R^2$  values than the original regression using a  
 425 Benjamini-Hochberg procedure with an FDR of 0.05.

426  
 427 **Regression Model Selection.** We implemented eight regression  
 428 models to predict gene expression profiles from the EcoMAC  
 429 dataset. All eight models, four linear regressors, two SVRs with  
 430 linear kernels, and two SVRs with gaussian kernels, predicted  
 431 gene expression profiles from the gene's TF expression profiles.  
 432 Four models included the gene's known sigma factors (32),  
 433 and two of the linear models accounted interactions between  
 434 TFs as shown below:

Model 1: Linear Model 435

$$Y_i = a_i + \sum_{j=1}^n b_{ij} y_{TFj}, \quad [1] \quad 436$$

Model 2: Linear Model with Sigma Factors 440

$$Y_i = a_i + \sum_{j=1}^n b_{ij} y_{TFj} + \sum_{j=1}^m c_{ij} y_{\sigma j}, \quad [2] \quad 441$$

Model 3: Linear Model with TF Interaction 445

$$Y_i = a_i + \sum_{j=1}^n b_{ij} y_{TFj} + \sum_{j=1}^n \sum_{k=1}^n d_{ijk} y_{TFj} y_{TFk}, \quad [3] \quad 446$$

Model 4: Linear Model with TF Interaction and Sigma  
 Factors 449

$$Y_i = a_i + \sum_{j=1}^n b_{ij} y_{TFj} + \sum_{j=1}^m c_{ij} y_{\sigma j} + \sum_{j=1}^n \sum_{k=1}^n d_{ijk} y_{TFj} y_{TFk}, \quad [4] \quad 450$$

Model 5: Linear SVR 455

$$Y_i = f(y_{TF1}, y_{TF2}, \dots), \quad [5] \quad 456$$

Model 6: Linear SVR and Sigma Factors 459

$$Y_i = f(y_{TF1}, y_{TF2}, \dots, y_{\sigma 1}, \dots), \quad [6] \quad 460$$

Model 7: SVR with Gaussian Kernel 462

$$Y_i = f(kernel(y_{TF1}, y_{TF2}, \dots)), \quad [7] \quad 463$$

Model 8: SVR with Gaussian Kernel and Sigma Factors 465

$$Y_i = f(kernel(y_{TF1}, y_{TF2}, \dots, y_{\sigma 1}, \dots)), \quad [8] \quad 466$$

467 where  $Y_i$  is the expression profile of gene  $i$ ,  $y_{TFj}$  is the  
 468 expression profile of TF  $j$ ,  $y_{\sigma j}$  is the expression profile of sigma  
 469 factor  $j$ ,  $a_i$  is the baseline expression level for gene  $i$ ,  $b_{ij}$  is the  
 470 coefficient of TF  $j$  on gene  $i$ ,  $c_{ij}$  is the coefficient of sigma factor  
 471  $j$  on gene  $i$ ,  $d_{ijk}$  is the interaction term between gene  $i$ , TF  $j$ ,  
 472 and TF  $k$ , and  $kernel$  is the gaussian kernel transformation.  
 473 The TF interaction terms were not required for the SVRs as  
 474 a gaussian kernel can account for nonlinearities and interplay  
 475 between regressors.  
 476

477 The models were evaluated using 10-fold cross validation,  
 478 with samples from the same lab under the same conditions  
 479 grouped in the same fold. We performed an F-test of overall  
 480 significance on Model 3 (Linear Model with TF Interaction)  
 481 to determine whether the model fit the data better than  
 482 an intercept-only model. In addition, an F-test of overall  
 483 significance was applied to an additional sigma factor-only  
 484 linear model (with interactions) to highlight the effects of  
 485 including sigma factors as regressors. We then compared the  
 486 linear model with the best accuracy (Model 4) to the SVR  
 487 with the best accuracy (Model 8) to compare the strength  
 488 of each algorithm using the Wilcoxon rank-sum test. The  
 489 model with the highest overall accuracy on the testing dataset  
 490 (Model 8) was used for the remainder of the analysis.

491 When shuffling the conditions, the TU expression profile  
 492 was shuffled 1000 times, while keeping the same TRN struc-  
 493 ture. P-values were determined by the number of these trials  
 494 that resulted in a higher  $R^2$  value than the original model, and  
 495 significance was assigned based on the Benjamini-Hochberg  
 496

497 procedure with an FDR of 0.05. To compare our TRN against  
498 a randomly generated TRN, a pool of all transcription factors  
499 were generated for each TU excluding those known to regulate  
500 the TU, any TFs in the TU, and any TFs that had a high mutual  
501 information with a TF known to regulate the TU. A pair  
502 of TFs with mutual information above the 75th percentile was  
503 designated as a high mutual information pair (see Fig. S13).  
504 Five hundred sets of transcription factors were selected from  
505 this pool, all with the same number of regulators as defined in  
506 the original TRN. As before, significance was assigned to each  
507 TU by determining the fraction of randomly generated TRNs  
508 with higher testing  $R^2$  values than the original regression using  
509 a Benjamini-Hochberg procedure with an FDR of 0.05.

510 **Surrogate Variable Analysis.** Surrogate variable analysis was per-  
511 formed as described in Leek and Storey (33). The residuals  
512 for the analysis were generated from the SVR model with  
513 sigma factors. Three surrogate variables were identified and  
514 compared against the compendium metadata.

515 **Comparing hiTRN with only high-confidence interactions in Regu-  
516 lonDB.** To further characterize the additional information added  
517 by high-confidence interactions identified by ChIP data, we  
518 performed the same analysis on EcoMAC with a new TRN that  
519 only contains the high-confidence interactions in RegulonDB.  
520 Since the input for network analysis is different (hiTRN versus  
521 RegulonDB network) for sigNetTrainer, it is difficult to com-  
522 pare the results for Figure 2. Instead, we made a table that  
523 compares the number of differentially-expressed genes that can  
524 be reached from the knocked-out TF in these two networks  
525 (see SI Table 1). Results suggested that numbers of DEGs  
526 decreased in most experiments when excluding ChIP-based  
527 interaction, especially experiments involving *arcA* and *fnr*.

528 Lastly, we did regression analysis on EcoMAC using the  
529 TRN with only RegulonDB interactions (Fig. S10). 596 of  
530 the 690 TUs with known regressors (86%) yielded significant  
531 differences between the shuffled expression profile regression  
532 and the original regression (FDR-adjusted  $P < 0.05$ ), and  
533 90 TUs (13% of 690) were predicted significantly better than  
534 random TRNs for the best SVR (FDR-adjusted  $P < 0.05$ ),  
535 which is similar to the results from the hiTRN.

536 **Comparison with COLOMBOS dataset.** To validate our results, we  
537 performed the same analysis on a different *E. coli* expression  
538 dataset COLOMBOS (21). We have used the same filtering  
539 standard as EcoMAC and calculated the missing data with  
540 the R package Impute (34). The processed COLOMBOS  
541 dataset has 4266 genes and 2049 profiles. We first selected  
542 the dimension of NMF reduction following Kim and Tidor’s  
543 method (17) to be 63, as many additional conditions are  
544 incorporated in COLOMBOS.

545 **Regulatory modules:** After reducing the COLOMBOS  
546 dataset using NMF, we ran the enrichment analysis on domi-  
547 nant genes of metagenes followed by community detection to  
548 identify TF modules. We compared the regulatory modules  
549 identified from EcoMAC and COLOMBOS (SI Dataset XX)  
550 using the variation of information (VI) (22). VI is a widely  
551 used metric to compare how similar two clusterings are:

$$552 \quad VI(X; Y) = H(X) + H(Y) - 2I(X, Y)$$

553 For  $n$  elements to cluster (i.e., genes), VI is bounded by  $\ln(n)$ .  
554 Alternatively, for  $k$  maximum clusters, VI is bounded by

555  $2\ln(k)$ . A normalized VI relative to either  $n$  or  $k$  is bounded  
556 between 0 and 1, where 0 indicates equivalent clusterings and 1  
557 indicates zero mutual information between the two clusterings.  
558 We computed VI using the clusters.stats function from the fpc  
559 R library (35), excluding the unclustered “noise class” from  
560 computations. There were  $n = 3070$  genes that were common  
561 between the regulons contained in both regulatory module  
562 sets, from the two expression compendia. The VI normalized  
563 by  $n$  genes was 0.17. Alternatively, the VI normalized by the  
564 number of modules ( $k = 11$ ) was 0.29. Both normalized VI  
565 values were significantly lower than 10,000 randomly generated  
566 regulatory modules (permutation test,  $P < 10^{-4}$ ). We gener-  
567 ated random networks preserving the number of nodes and  
568 edges but with randomly re-assigned edges and edge weights  
569 randomly sampled within the range of observed weights. We  
570 then computed the VI between these random modules and the  
571 EcoMAC-based core TRN and compare the VI against that  
572 between EcoMAC and COLOMBOS. Based on these tests, we  
573 finally concluded that the core TRN identified was significantly  
574 preserved regardless of the transcriptomics data set used.

575 **TRN coverage:** In addition, we have also extracted 9 TF  
576 knockout experiments from COLOMBOS dataset. Excluding  
577 the experiments with missing reference sample and no DEG  
578 identified, we calculated the consistency and reachability of  
579 DEGs in hiTRN to knocked out TF for 4 experiments (see Fig.  
580 S2) using SigNetTrainer (29). The result is similar to the 21  
581 TF knockout experiments we previously analyzed. Consistency  
582 between prediction and experimental measurement is between  
583 59% and 99%, while 56% of DEGs can be traced back to the  
584 knocked out TF (only considering 3 experiments that have  
585 more than 10 DEGs identified).

586 **Quantitative gene expression prediction:** Moreover, we also  
587 performed the regression analysis on this dataset S9. 1081 of  
588 the 1375 TUs with known regressors (79%) yielded significant  
589 differences between the shuffled expression profile regression  
590 and the original regression (FDR-adjusted  $P < 0.05$ ), and  
591 122 TUs (9% of 1375) were predicted significantly better than  
592 random TRNs for the best SVR (FDR-adjusted  $P < 0.05$ ).  
593 Using only strong interactions from RegulonDB S11, 553 of  
594 the 690 TUs with known regressors (80%) yielded significant  
595 differences between the shuffled expression profile regression  
596 and the original regression, and 85 TUs (12% of 690) were  
597 predicted significantly better than random TRNs. These  
598 statistics are close to the values generated from the EcoMAC  
599 dataset. The mutual information analysis showed that 26%  
600 (36/137) of known TFs shared significantly higher MI with  
601 genes inside as compared to outside their regulons (FDR  
602  $< 0.05$ ), which is also on par with the data generated from  
603 EcoMAC (28% or 39/137).

604 **Comparing TF modules with previous works.** We compared the TF  
605 modules we have identified with previous work done by other  
606 groups. Baliga lab has identified 590 conditionally co-regulated  
607 modules (corems) from a gene expression compendium (36).  
608 We compared the corems with the TF modules we proposed  
609 by performing enrichment analysis of TF modules for each  
610 corem on the gene level. The results showed that 230/590  
611 corems are enriched by at least 1 TF module (see Dataset  
612 S3), which shows correlation between some corems and TF  
613 modules. For the rest of the corems that are not enriched for  
614 any TF modules, potential explanations are: 1. Since we only  
615 included high-confidence interactions in hiTRN, not all the  
616

621 genes in corems are part of the hiTRN; 2. The *E. coli* expression  
 622 compendium used to create corems has more conditions (e.g.  
 623 heat, pH, metal) than EcoMAC, so it is possible that the  
 624 proposed TF modules did not incorporate information related  
 625 to such conditions. Thus, using a larger compendium with  
 626 more conditions to create the TF modules could potentially  
 627 improve the results.

628  
629  
630  
631  
632  
633  
634  
635  
636  
637  
638  
639  
640  
641  
642  
643  
644  
645  
646  
647  
648  
649  
650  
651  
652  
653  
654  
655  
656  
657  
658  
659  
660  
661  
662  
663  
664  
665  
666  
667  
668  
669  
670  
671  
672  
673  
674  
675  
676  
677  
678  
679  
680  
681  
682

## SI Appendix References

1. Gama-Castro S, et al. (2015) Regulondb version 9.0: high-level integration of gene regulation, coexpression, motif clustering and beyond. *Nucleic Acids Research* p. gkv1156.
2. Federowicz S, et al. (2014) Determining the control circuitry of redox metabolism at the genome-scale. *PLoS Genet.* 10(4):e1004264.
3. Myers KS, et al. (2013) Genome-scale analysis of escherichia coli FNR reveals complex features of transcription factor binding. *PLoS Genet.* 9(6):e1003565.
4. Park DM, Akhtar MS, Ansari AZ, Landick R, Kiley PJ (2013) The bacterial response regulator ArcA uses a diverse binding site architecture to regulate carbon oxidation globally. *PLoS Genet.* 9(10):e1003839.
5. Cho S, et al. (2015) The architecture of ArgR-DNA complexes at the genome-scale in escherichia coli. *Nucleic Acids Res.* 43(6):3079–3088.
6. Cho BK, Federowicz S, Park YS, Zengler K, Palsson BO (2012) Deciphering the transcriptional regulatory logic of amino acid metabolism. *Nat. Chem. Biol.* 8(1):65–71.
7. Seo SW, et al. (2014) Deciphering fur transcriptional regulatory network highlights its complex role beyond iron metabolism in escherichia coli. *Nat. Commun.* 5:4910.
8. Seo SW, Kim D, O'Brien EJ, Szubin R, Palsson BO (2015) Decoding genome-wide GadEWX-transcriptional regulatory networks reveals multifaceted cellular responses to acid stress in escherichia coli. *Nat. Commun.* 6:7970.
9. Seo SW, Kim D, Szubin R, Palsson BO (2015) Genome-wide reconstruction of OxyR and SoxRS transcriptional regulatory networks under oxidative stress in escherichia coli K-12 MG1655. *Cell Rep.* 12(8):1289–1299.
10. Cho BK, et al. (2011) The PurR regulon in escherichia coli K-12 MG1655. *Nucleic Acids Res.* 39(15):6456–6464.
11. Latif H, et al. (year?) "chip-exo interrogation of crp, dna, and mnap holoenzyme interactions". *bioRxiv* doi:10.1101/069021.
12. Kim D, et al. (2016) Systems assessment of transcriptional regulation on central carbon metabolism by cra and CRP. *bioRxiv* doi:10.1101/080929.
13. Carrera J, et al. (2014) An integrative, multi-scale, genome-wide model reveals the phenotypic landscape of escherichia coli. *Mol. Syst. Biol.* 10(7):735.
14. Yang L, et al. (2015) Systems biology definition of the core proteome of metabolism and expression is consistent with high-throughput data. *Proceedings of the National Academy of Sciences* 112(34):10810–10815.
15. Kim PM, Tidor B (2003) Subsystem identification through dimensionality reduction of large-scale gene expression data. *Genome Res.* 13(7):1706–1718.
16. Wu S, et al. (2016) Stability-driven nonnegative matrix factorization to interpret spatial gene expression and build local gene networks. *Proc. Natl. Acad. Sci. U. S. A.* 113(16):4290–4295.
17. Kim PM, Tidor B (2003) Subsystem identification through dimensionality reduction of large-scale gene expression data. *Genome Res.* 13(7):1706–1718.
18. Pascual-Montano A, Carazo JM, Kochi K, Lehmann D, Pascual-Marqui RD (2006) Nonsmooth nonnegative matrix factorization (nsNMF). *IEEE Trans. Pattern Anal. Mach. Intell.* 28(3):403–415.
19. Csardi G, Nepusz T (2006) The igraph software package for complex network research. *InterJournal, Complex Systems* 1695(5):1–9.
20. Dennis G, et al. (2003) David: database for annotation, visualization, and integrated discovery. *Genome Biology* 4(9):R60.
21. Moretto M, et al. (2016) Colombos v3. 0: leveraging gene expression compendia for cross-species analyses. *Nucleic acids research* 44(D1):D620–D623.
22. Meilă M (2003) Comparing clusterings by the variation of information in *Learning theory and kernel machines*. (Springer), pp. 173–187.
23. Aziz RK, et al. (2008) The rast server: rapid annotations using subsystems technology. *BMC genomics* 9(1):75.
24. Roy A, Kucukural A, Zhang Y (2010) I-TASSER: a unified platform for automated protein structure and function prediction. *Nat. Protoc.* 5(4):725–738.
25. Ye Y, Godzik A (2003) Flexible structure alignment by chaining aligned fragment pairs allowing twists. *Bioinformatics* 19 Suppl 2:ii246–55.
26. Xu J, Zhang Y (2010) How significant is a protein structure similarity with TM-score = 0.5? *Bioinformatics* 26(7):889–895.
27. Madan Babu M, Teichmann SA (2003) Functional determinants of transcription factors in escherichia coli: protein families and binding sites. *Trends Genet.* 19(2):75–79.
28. Ritchie ME, et al. (2015) limma powers differential expression analyses for RNA-sequencing and microarray studies. *Nucleic Acids Res.* 43(7):e47.
29. Melas IN, Samaga R, Alexopoulos LG, Klamt S (2013) Detecting and removing inconsistencies between experimental data and signaling network topologies using integer linear programming on interaction graphs. *PLoS Comput. Biol.* 9(9):e1003204.
30. Kraskov A, Stögbauer H, Grassberger P (2004) Estimating mutual information. *Physical Review E* 69(6):066138.
31. Pedregosa F, et al. (2011) Scikit-learn: Machine learning in python. *J. Mach. Learn. Res.* 12(Oct):2825–2830.
32. Cho BK, Kim D, Knight EM, Zengler K, Palsson BO (2014) Genome-scale reconstruction of the sigma factor network in escherichia coli: topology and functional states. *BMC Biol.* 12:4.
33. Leek JT, Storey JD (2007) Capturing heterogeneity in gene expression studies by surrogate variable analysis. *PLoS Genet.* 3(9):1724–1735.
34. Hastie T, Tibshirani R, Narasimhan B, Chu G (2012) Impute: imputation for microarray data. *R package version* 1(0).
35. Hennig C (2015) *fpc: Flexible Procedures for Clustering*. R package version 2.1-10.
36. Brooks AN, et al. (2014) A system-level model for the microbial regulatory genome. *Mol Syst Biol* 10(7):740.

## SI Figures

683  
684  
685  
686  
687  
688  
689  
690  
691  
692  
693  
694  
695  
696  
697  
698  
699  
700  
701  
702  
703  
704  
705  
706  
707  
708  
709  
710  
711  
712  
713  
714  
715  
716  
717  
718  
719  
720  
721  
722  
723  
724  
725  
726  
727  
728  
729  
730  
731  
732  
733  
734  
735  
736  
737  
738  
739  
740  
741  
742  
743  
744



869  
870  
871  
872  
873  
874  
875  
876  
877  
878  
879  
880  
881  
882  
883  
884  
885  
886  
887  
888  
889  
890  
891  
892  
893  
894  
895  
896  
897  
898  
899  
900  
901  
902  
903  
904  
905  
906  
907  
908  
909  
910  
911  
912  
913  
914  
915  
916  
917  
918  
919  
920  
921  
922  
923  
924  
925  
926  
927  
928  
929  
930

931  
932  
933  
934  
935  
936  
937  
938  
939  
940  
941  
942  
943  
944  
945  
946  
947  
948  
949  
950  
951  
952  
953  
954  
955  
956  
957  
958  
959  
960  
961  
962  
963  
964  
965  
966  
967  
968  
969  
970  
971  
972  
973  
974  
975  
976  
977  
978  
979  
980  
981  
982  
983  
984  
985  
986  
987  
988  
989  
990  
991  
992

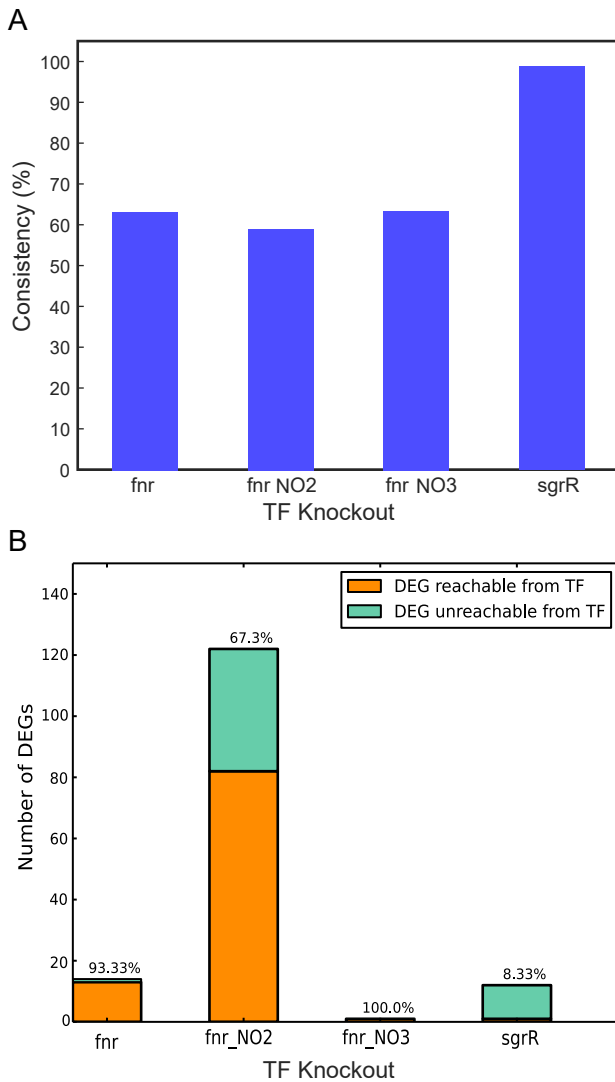

**Fig. S2.** Consistency of hiTRN with observed differential gene expression in TF knockout experiments from COLOMBOS dataset. (A) Consistency of hiTRN with observed differential and non-differential gene expression accounting for regulatory bias (sign consistency). (B) Reachability from deleted TFs to DEGs in the TRN. Percentages above each bar are the percentage of DEGs that were reachable from the deleted TF within the TRN.

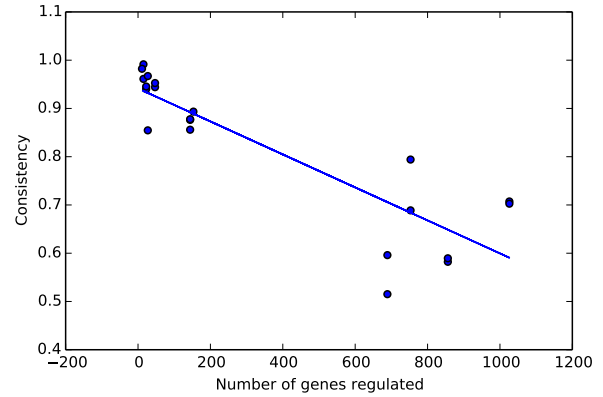

**Fig. S3.** Correlation between the number of genes regulated and consistency between TRN prediction and experimental measurement. The Pearson correlation coefficient is -0.875 and the p-value is  $2.10 \times 10^{-7}$ .

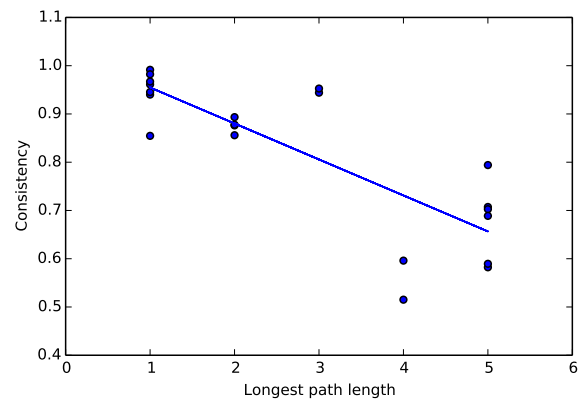

**Fig. S4.** Correlation between the length of the longest regulatory path of a TF and sign consistency between TRN prediction and experimental measurement. The Pearson correlation coefficient is -0.82 and the p-value is  $5.07 \times 10^{-6}$ .



993  
994  
995  
996  
997  
998  
999  
1000  
1001  
1001  
1002  
1003  
1004  
1005  
1006  
1007  
1008  
1009  
1010  
1011  
1012  
1013  
1014  
1015  
1016  
1017  
1018  
1019  
1020  
1021  
1022  
1023  
1024  
1025  
1026  
1027  
1028  
1029  
1030  
1031  
1032  
1033  
1034  
1035  
1036  
1037  
1038  
1039  
1040  
1041  
1042  
1043  
1044  
1045  
1046  
1047  
1048  
1049  
1050  
1051  
1052  
1053  
1054

1055  
1056  
1057  
1058  
1059  
1060  
1061  
1062  
1063  
1064  
1065  
1066  
1067  
1068  
1069  
1070  
1071  
1072  
1073  
1074  
1075  
1076  
1077  
1078  
1079  
1080  
1081  
1082  
1083  
1084  
1085  
1086  
1087  
1088  
1089  
1090  
1091  
1092  
1093  
1094  
1095  
1096  
1097  
1098  
1099  
1100  
1101  
1102  
1103  
1104  
1105  
1106  
1107  
1108  
1109  
1110  
1111  
1112  
1113  
1114  
1115  
1116

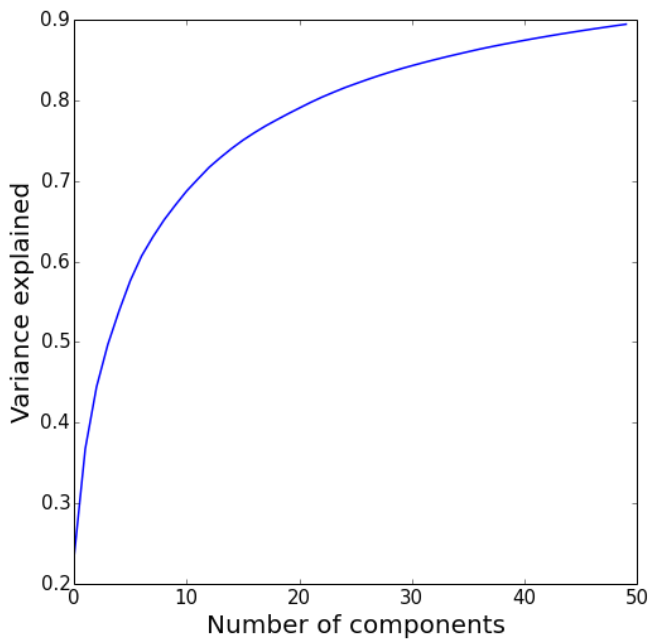

**Fig. S5.** Variance explained by principal components. The first 40 principal components explain 88% of the variance of the EcoMAC dataset.

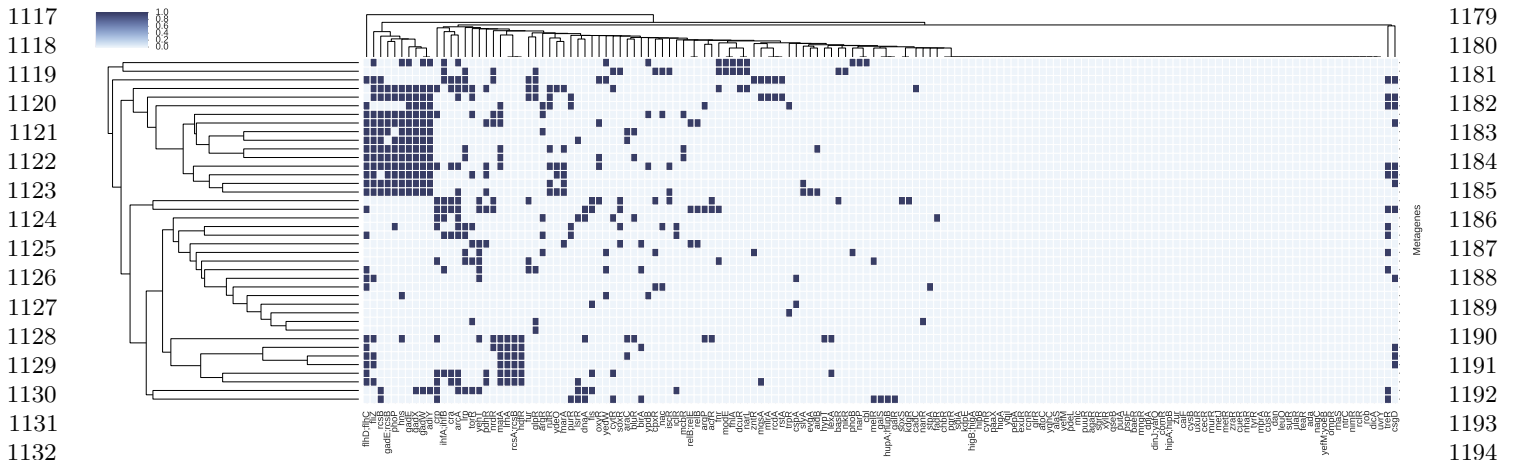

**Fig. S6.** Regulon enrichment on 40 metagenes identified from EcoMAC. Enrichment on all 147 regulons are shown here.

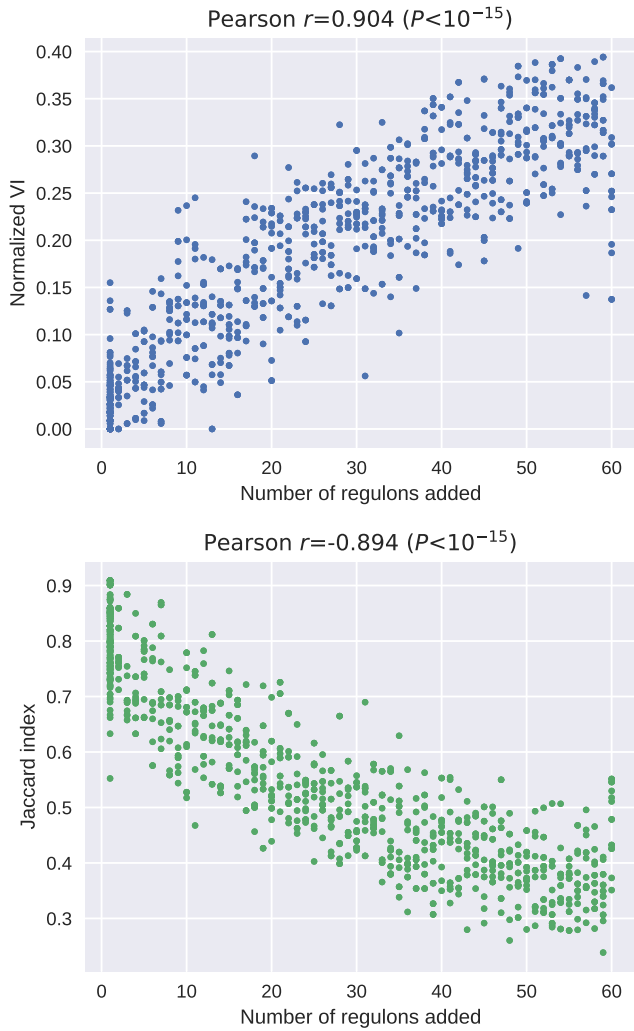

**Fig. S7.** Stability of TF modules as quantified by normalized variation of information and Jaccard index of when low-confidence interactions were added to the hiTRN from up to 60 random regulons, 10 times each.

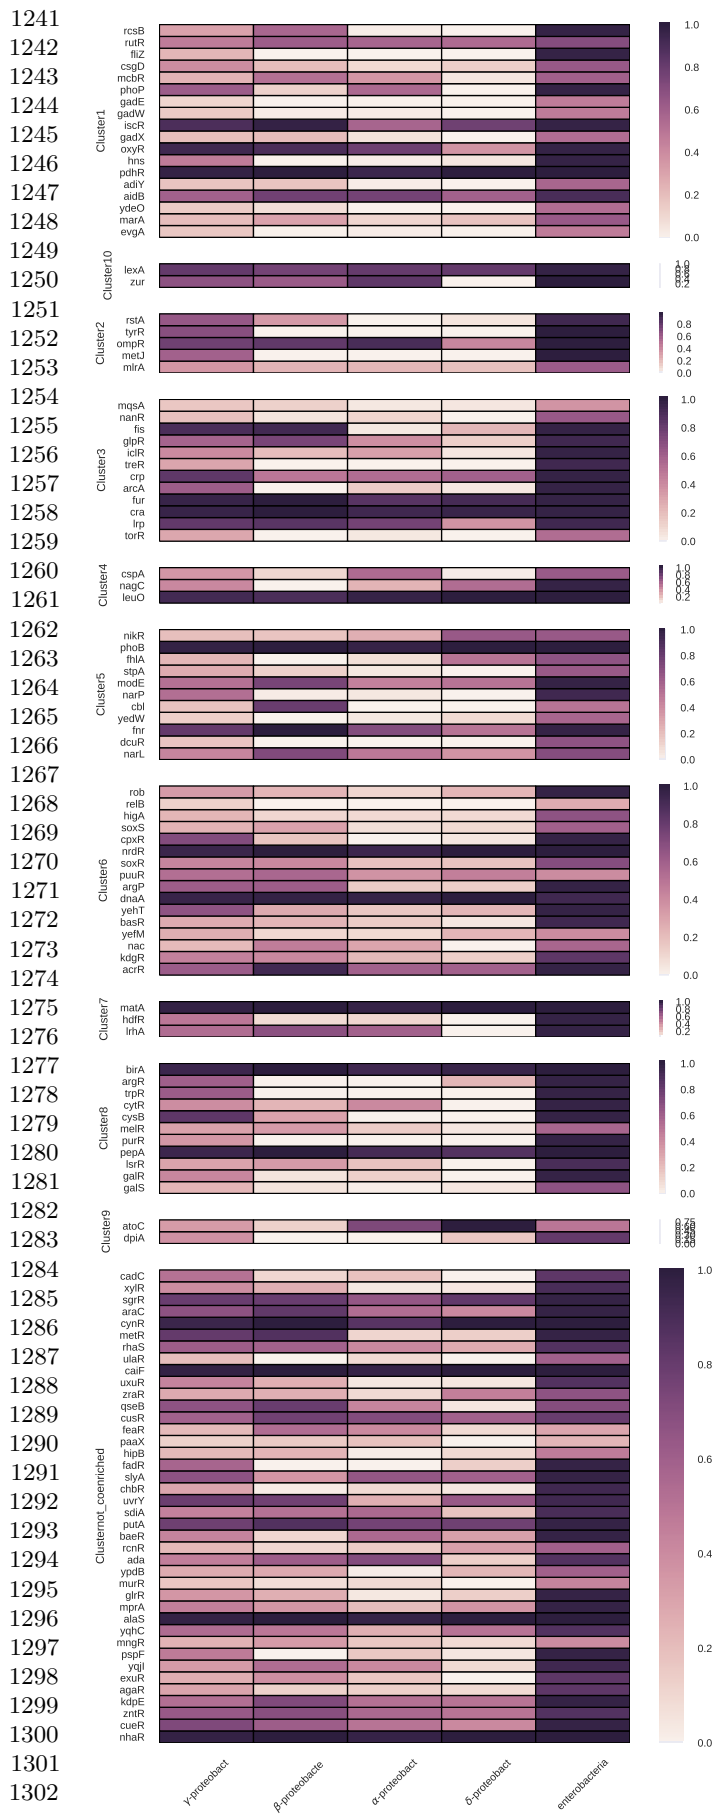

Fang et al. Fig. S8. Evolutionary conservation of TF clusters.

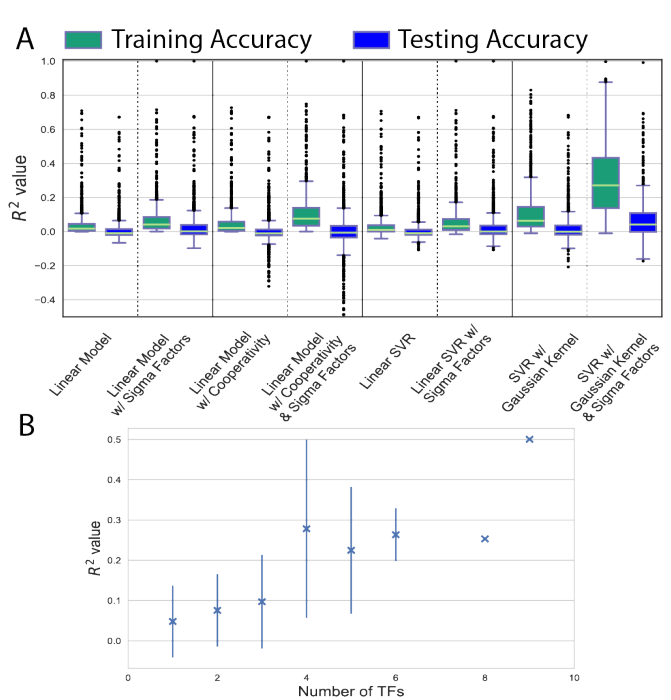

Fig. S9. Accuracy of expression predictions on training and held-out testing transcription units. (A)  $R^2$  of predicted expression profile vs. true expression profile using various regression models from COLOMBOS dataset. (B)  $R^2$  value of the testing dataset predicted by a gaussian kernel SVR, grouped by number of known TFs. Error bars indicate standard deviation for groups with  $>3$  observations.

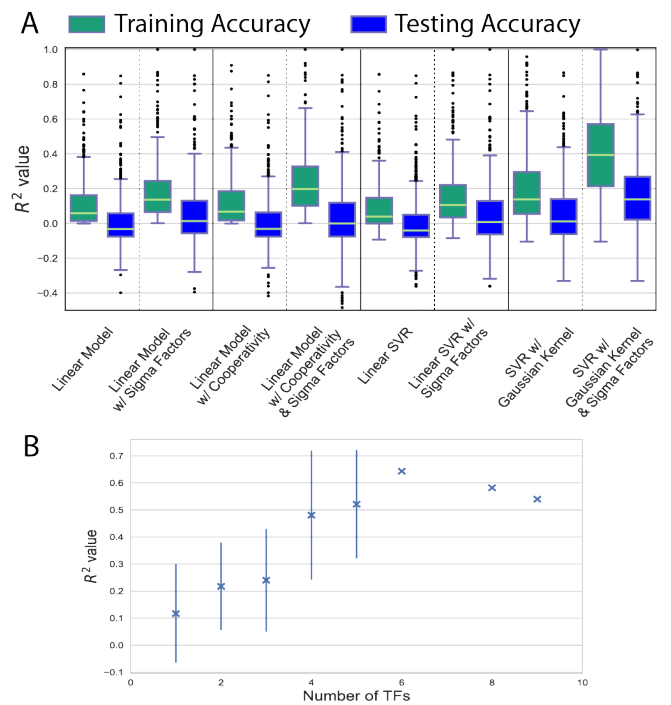

Fig. S10. Accuracy of expression predictions on training and held-out testing transcription units using only strong interactions from RegulonDB. (A)  $R^2$  of predicted expression profile vs. true expression profile using various regression models from EcoMAC dataset. (B)  $R^2$  value of the testing dataset predicted by a gaussian kernel SVR, grouped by number of known TFs. Error bars indicate standard deviation for groups with  $>3$  observations.

1365  
1366  
1367  
1368  
1369  
1370  
1371  
1372  
1373  
1374  
1375  
1376  
1377  
1378  
1379  
1380  
1381  
1382  
1383  
1384  
1385  
1386  
1387  
1388  
1389  
1390  
1391  
1392  
1393  
1394  
1395  
1396  
1397  
1398  
1399  
1400  
1401  
1402  
1403  
1404  
1405  
1406  
1407  
1408  
1409  
1410  
1411  
1412  
1413  
1414  
1415  
1416  
1417  
1418  
1419  
1420  
1421  
1422  
1423  
1424  
1425  
1426

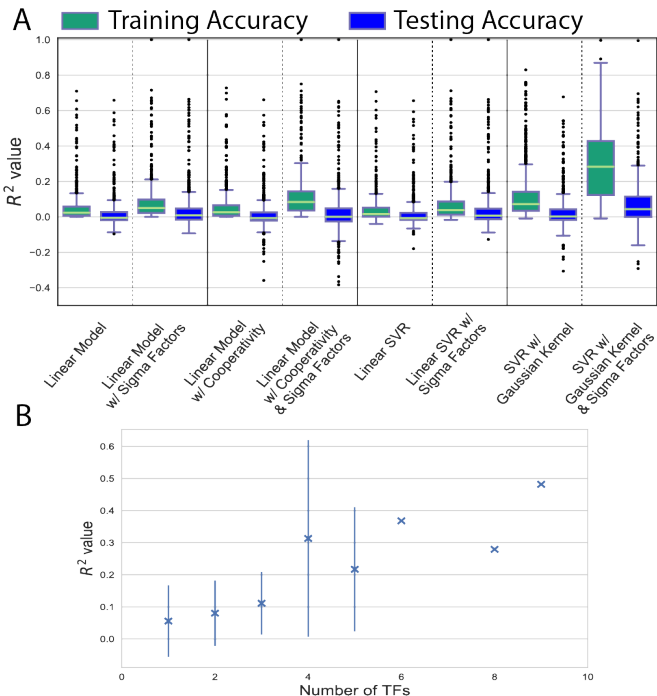

**Fig. S11.** Accuracy of expression predictions on training and held-out testing transcription units using only strong interactions from RegulonDB. (A)  $R^2$  of predicted expression profile vs. true expression profile using various regression models from COLOMBOS dataset. (B)  $R^2$  value of the testing dataset predicted by a gaussian kernel SVR, grouped by number of known TFs. Error bars indicate standard deviation for groups with >3 observations.

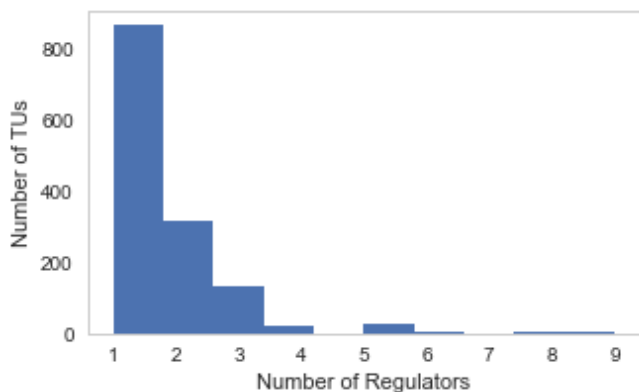

**Fig. S12.** Number of known regulators per TU.

1427  
1428  
1429  
1430  
1431  
1432  
1433  
1434  
1435  
1436  
1437  
1438  
1439  
1440  
1441  
1442  
1443  
1444  
1445  
1446  
1447  
1448  
1449  
1450  
1451  
1452  
1453  
1454  
1455  
1456  
1457  
1458  
1459  
1460  
1461  
1462  
1463  
1464  
1465  
1466  
1467  
1468  
1469  
1470  
1471  
1472  
1473  
1474  
1475  
1476  
1477  
1478  
1479  
1480  
1481  
1482  
1483  
1484  
1485  
1486  
1487  
1488

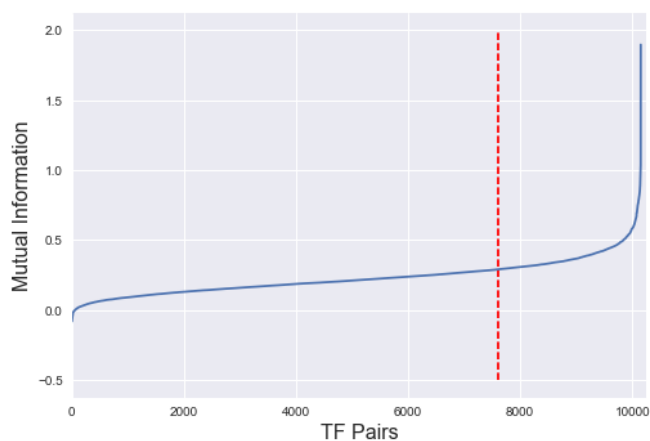

**Fig. S13.** Sorted MI values between all pairs of transcription factors. Any TF with mutual information higher than the 75th percentile (red dashed line) with any known regulators of each TU were prohibited from being selected as a random regulator when comparing regression results of a randomized TRN to the known TRN.

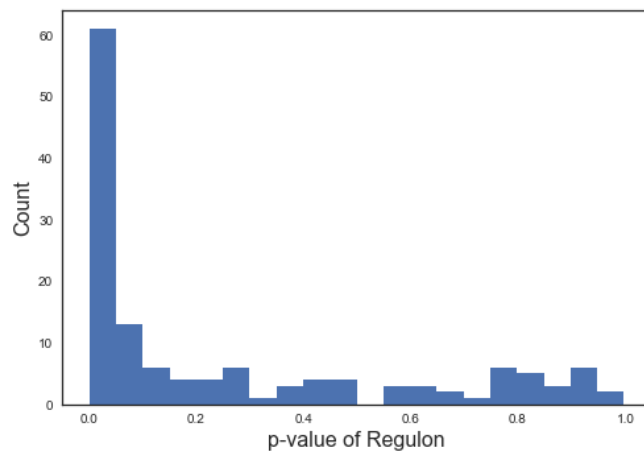

**Fig. S14.** P-values of observing higher mutual information between a TF and its regulon as compared to null MI distributions. The p-value was calculated by comparing the mutual information between the TF and its regulated genes with the mutual information between the TF and non-regulated genes.

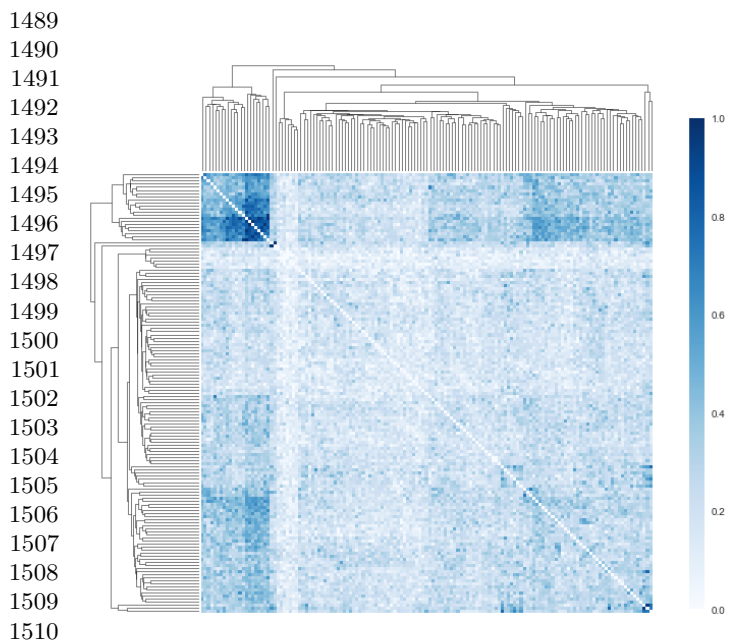

1511 **Fig. S15.** Clustered heatmap of mutual information between all 147 transcription factors in the hiTRN.

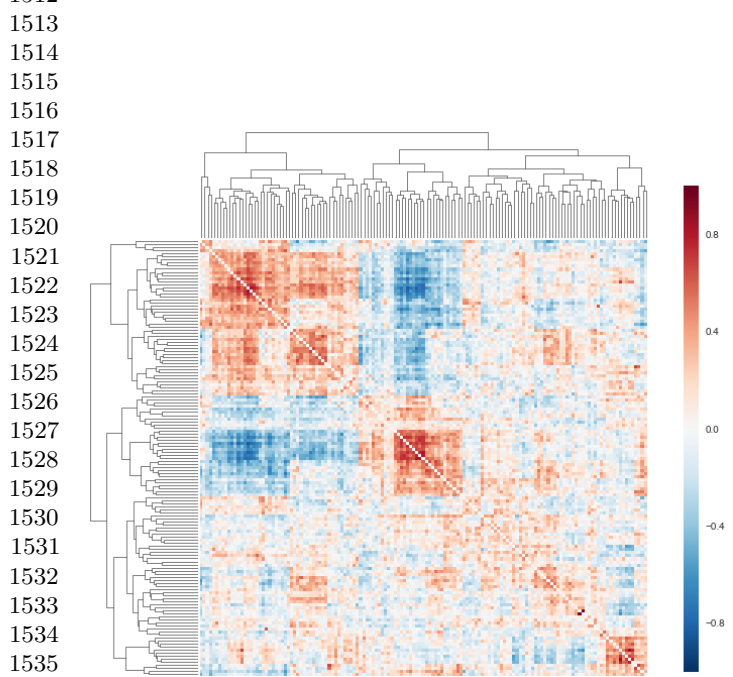

1537 **Fig. S16.** Clustered heatmap of Pearson R correlation between all 147 transcription factors in the hiTRN.

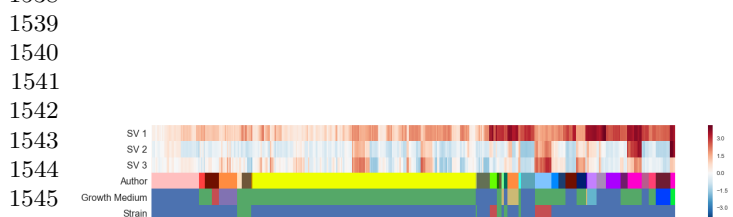

1547 **Fig. S17.** Surrogate variables identified from SVA, aligned with various possible sources of expression heterogeneity, including author, growth medium and strain.

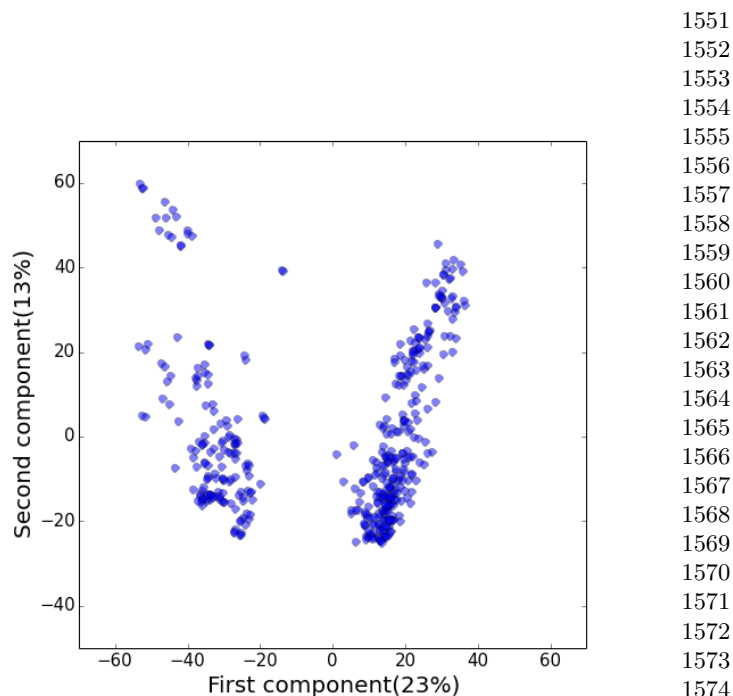

1577 **Fig. S18.** The first and second principal components of the PCA analysis. Each data point represents an experiment. Data points are separated into 3 distinct groups by the first and second components.

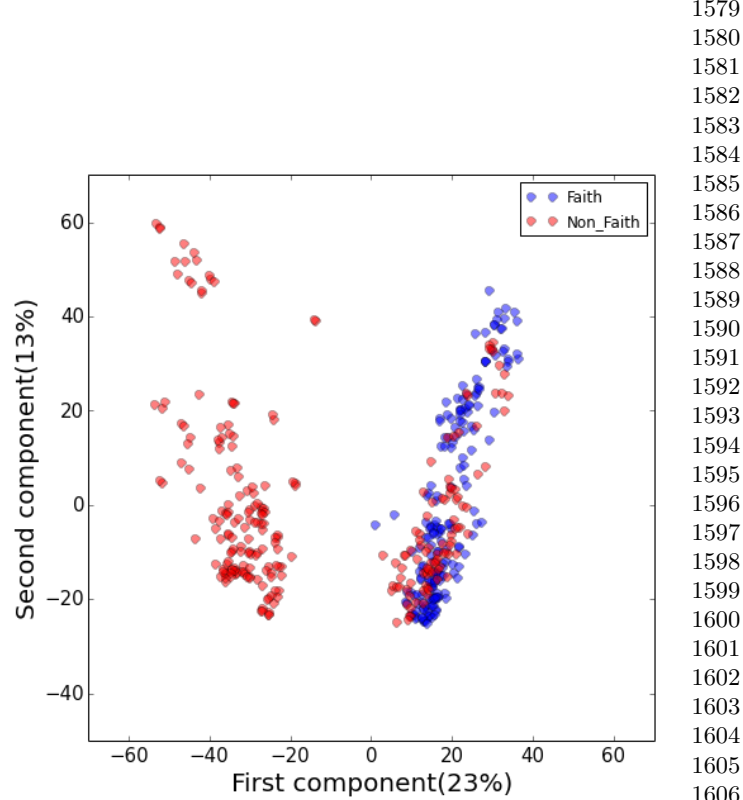

1607 **Fig. S19.** The first and second principal components labeled by experimenters. The experiments done by the Faith lab and other labs are represented by blue and red dots, respectively.

1613  
1614  
1615  
1616  
1617  
1618  
1619  
1620  
1621  
1622  
1623  
1624  
1625  
1626  
1627  
1628  
1629  
1630  
1631  
1632  
1633  
1634  
1635  
1636  
1637  
1638  
1639  
1640  
1641  
1642  
1643  
1644  
1645  
1646  
1647  
1648  
1649  
1650  
1651  
1652  
1653  
1654  
1655  
1656  
1657  
1658  
1659  
1660  
1661  
1662  
1663  
1664  
1665  
1666  
1667  
1668  
1669  
1670  
1671  
1672  
1673  
1674

1675  
1676  
1677  
1678  
1679  
1680  
1681  
1682  
1683  
1684  
1685  
1686  
1687  
1688  
1689  
1690  
1691  
1692  
1693  
1694  
1695  
1696  
1697  
1698  
1699  
1700  
1701  
1702  
1703  
1704  
1705  
1706  
1707  
1708  
1709  
1710  
1711  
1712  
1713  
1714  
1715  
1716  
1717  
1718  
1719  
1720  
1721  
1722  
1723  
1724  
1725  
1726  
1727  
1728  
1729  
1730  
1731  
1732  
1733  
1734  
1735  
1736

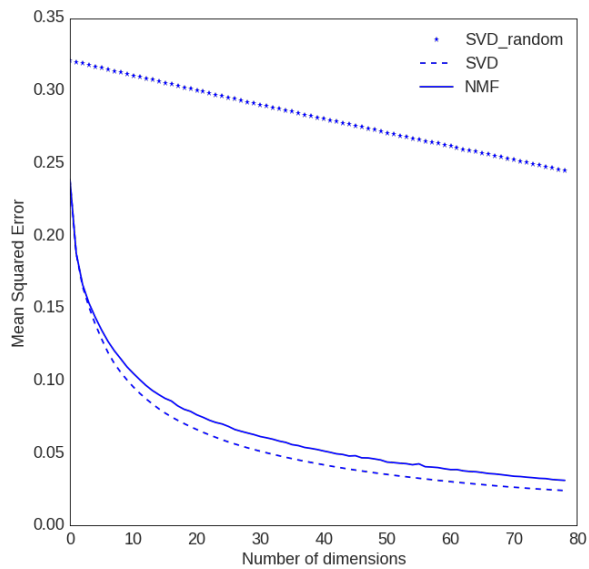

**Fig. S20.** Mean squared error of NMF and SVD of the EcoMAC dataset as a function of number of dimensions. SVD was also performed on random datasets for comparison. Dimensions between 35-50 are appropriate to describe the dimension of the data, as the slope of the NMF graph is similar to that of SVD on random matrix.

1737 **SI Tables**

|      |      |
|------|------|
| 1738 | 1799 |
| 1739 | 1800 |
| 1740 | 1801 |
| 1741 | 1802 |
| 1742 | 1803 |
| 1743 | 1804 |
| 1744 | 1805 |
| 1745 | 1806 |
| 1746 | 1807 |
| 1747 | 1808 |
| 1748 | 1809 |
| 1749 | 1810 |
| 1750 | 1811 |
| 1751 | 1812 |
| 1752 | 1813 |
| 1753 | 1814 |
| 1754 | 1815 |
| 1755 | 1816 |
| 1756 | 1817 |
| 1757 | 1818 |
| 1758 | 1819 |
| 1759 | 1820 |
| 1760 | 1821 |
| 1761 | 1822 |
| 1762 | 1823 |
| 1763 | 1824 |
| 1764 | 1825 |
| 1765 | 1826 |
| 1766 | 1827 |
| 1767 | 1828 |
| 1768 | 1829 |
| 1769 | 1830 |
| 1770 | 1831 |
| 1771 | 1832 |
| 1772 | 1833 |
| 1773 | 1834 |
| 1774 | 1835 |
| 1775 | 1836 |
| 1776 | 1837 |
| 1777 | 1838 |
| 1778 | 1839 |
| 1779 | 1840 |
| 1780 | 1841 |
| 1781 | 1842 |
| 1782 | 1843 |
| 1783 | 1844 |
| 1784 | 1845 |
| 1785 | 1846 |
| 1786 | 1847 |
| 1787 | 1848 |
| 1788 | 1849 |
| 1789 | 1850 |
| 1790 | 1851 |
| 1791 | 1852 |
| 1792 | 1853 |
| 1793 | 1854 |
| 1794 | 1855 |
| 1795 | 1856 |
| 1796 | 1857 |
| 1797 | 1858 |
| 1798 | 1859 |
|      | 1860 |

1861  
1862  
1863  
1864  
1865  
1866  
1867  
1868  
1869  
1870  
1871  
1872  
1873  
1874  
1875  
1876  
1877  
1878  
1879  
1880  
1881  
1882  
1883  
1884  
1885  
1886  
1887  
1888  
1889  
1890  
1891  
1892  
1893  
1894  
1895  
1896  
1897  
1898  
1899  
1900  
1901  
1902  
1903  
1904  
1905  
1906  
1907  
1908  
1909  
1910  
1911  
1912  
1913  
1914  
1915  
1916  
1917  
1918  
1919  
1920  
1921  
1922

1923  
1924  
1925  
1926  
1927  
1928  
1929  
1930  
1931  
1932  
1933  
1934  
1935  
1936  
1937  
1938  
1939  
1940  
1941  
1942  
1943  
1944  
1945  
1946  
1947  
1948  
1949  
1950  
1951  
1952  
1953  
1954  
1955  
1956  
1957  
1958  
1959  
1960  
1961  
1962  
1963  
1964  
1965  
1966  
1967  
1968  
1969  
1970  
1971  
1972  
1973  
1974  
1975  
1976  
1977  
1978  
1979  
1980  
1981  
1982  
1983  
1984

**Table S1. Number of differentially expressed genes that can be traced back to the knocked out TFs**

| Experiment        | # of DEG reachable in RegulonDB | # of DEG reachable in hiTRN |
|-------------------|---------------------------------|-----------------------------|
| narL+Nitrate      | 20                              | 20                          |
| narL/narP+Nitrate | 19                              | 19                          |
| narP+Nitrate      | 1                               | 1                           |
| narL+NO           | 5                               | 5                           |
| narL/narP+NO      | 9                               | 9                           |
| narP+NO           | 1                               | 1                           |
| <b>arcA</b>       | <b>12</b>                       | <b>141</b>                  |
| <b>fnr</b>        | <b>4</b>                        | <b>148</b>                  |
| arcA/fnr          | 0                               | 0                           |
| oxyR+fumarate     | 3                               | 6                           |
| oxyR+Nitrate      | 9                               | 15                          |
| <b>arcA</b>       | <b>7</b>                        | <b>140</b>                  |
| <b>fnr</b>        | <b>1</b>                        | <b>169</b>                  |
| <b>arcA/fnr</b>   | <b>7</b>                        | <b>165</b>                  |
| oxyR              | 2                               | 3                           |
| soxS              | 3                               | 3                           |
| crp+nor           | 30                              | 54                          |
| dnaA+nor          | 0                               | 0                           |
| fis+nor           | 18                              | 27                          |
| purR              | 3                               | 12                          |
| purR+adenine      | 1                               | 14                          |
